# Supplementary material
Source: PubMed Central journal article supplement (PMC2787459)

## Hepa-1 cells

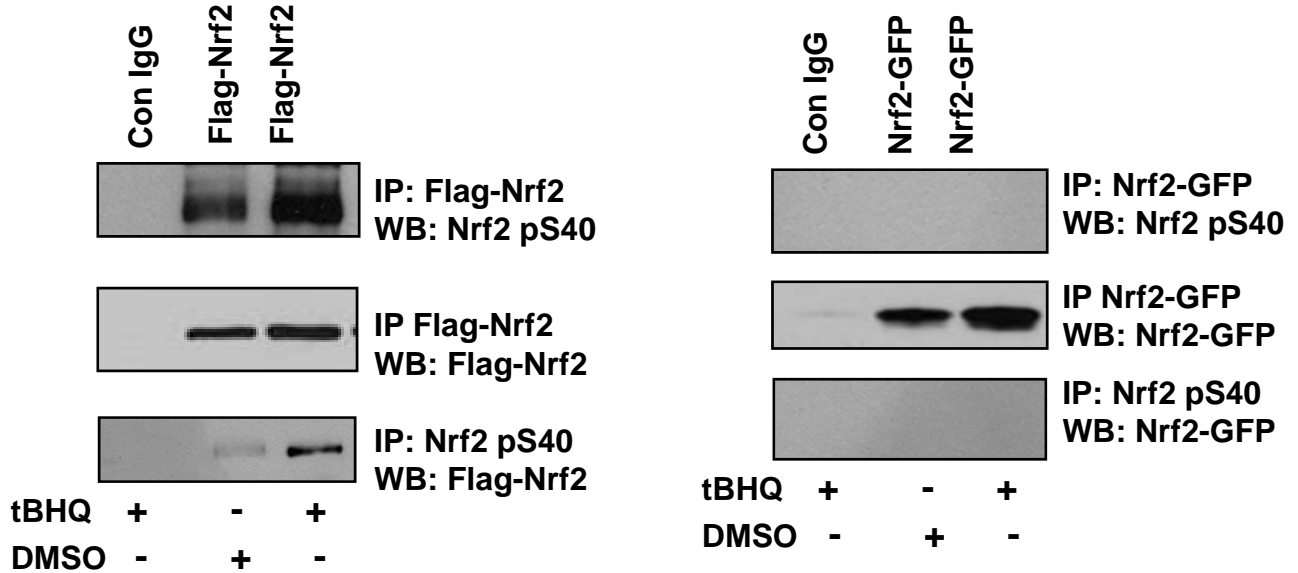

Supplement: supp_122_24_4452__1.pdf [file supp_122_24_4452__1.pdf]
